# Supplementary material for: Germacranolides from Carpesium divaricatum: Some New Data on Cytotoxic and Anti-Inflammatory Activity
Source: MDPI journal article supplement (doi:10.3390/molecules26154644), 2021-07-30
Supplement: s1 [file s1]

## SUPPLEMENTARY MATERIAL

### **Germacranolides from *Carpesium divaricatum*: some new data on cytotoxic and anti-inflammatory activity**

Natalia Kłeczek <sup>1</sup>, Janusz Malarz <sup>1</sup>, Barbara Gierlikowska <sup>2</sup>, Łukasz Skalniak <sup>3</sup>, Agnieszka Galanty <sup>4</sup>, Anna K. Kiss <sup>5</sup> and Anna Stojakowska <sup>1,\*</sup>

<sup>1</sup> Maj Institute of Pharmacology, Polish Academy of Sciences, Smętna street 12, 31-343 Kraków, Poland; kleczek@if-pan.krakow.pl (N.K.); malarzj@if-pan.krakow.pl (J.M.); stoja@if-pan.krakow.pl (A.S.)

<sup>2</sup> Department of Laboratory Diagnostics and Clinical Immunology of Developmental Age, Medical University of Warsaw, 63a Żwirki i Wigury street, 02-091 Warsaw, Poland; barbara.gierlikowska@wum.edu.pl (B.G.)

<sup>3</sup> Faculty of Chemistry, Jagiellonian University, Gronostajowa street 2, 30-387 Kraków, Poland; lukasz.skalniak@uj.edu.pl (L.S)

<sup>4</sup> Jagiellonian University Medical College, Department of Pharmacognosy, Medyczna street 9, 30-688 Kraków, Poland; mfgalant@cyf-kr.edu.pl (A.G.)

<sup>5</sup> Department of Pharmacognosy and Molecular Basis of Phytotherapy, Medical University of Warsaw, 1 Banacha street, 02-097 Warsaw, Poland; akiss@wum.edu.pl (A.K.K.)

- Correspondence: stoja@if-pan.krakow.pl; Tel.: +48 126623254

### Figures:

Fig. S1. HRESIMS spectrum of 4 $\beta$ ,8 $\alpha$ -dihydroxy- 5 $\beta$ -angeloyloxy-9 $\beta$ -(2-methylbutyryloxy)-3-oxo-germacran-6 $\alpha$ ,12-olide (**1**)

Fig. S2. <sup>1</sup>H NMR spectrum of **1**

Fig. S3. HRESIMS spectrum of 4 $\beta$ ,8 $\alpha$ -dihydroxy-5 $\beta$ -angeloyloxy-9 $\beta$ -(3-methylbutyryloxy)-3-oxo-germacran- 6 $\alpha$ ,12-olide (cardivarolide G, **2**)

Fig. S4. <sup>1</sup>H NMR spectrum of **2** in CDCl<sub>3</sub>

Fig. S5. <sup>1</sup>H NMR spectrum of **2** in CD<sub>3</sub>OD

Fig. S6. HRESIMS spectrum of 4 $\beta$ ,8 $\alpha$ -dihydroxy-5 $\beta$ -isobutyryloxy-9 $\beta$ -(3-methylbutyryloxy)-3-oxo-germacran-6 $\alpha$ ,12-olide (**3**)

Fig. S7. <sup>1</sup>H NMR spectrum of **3**

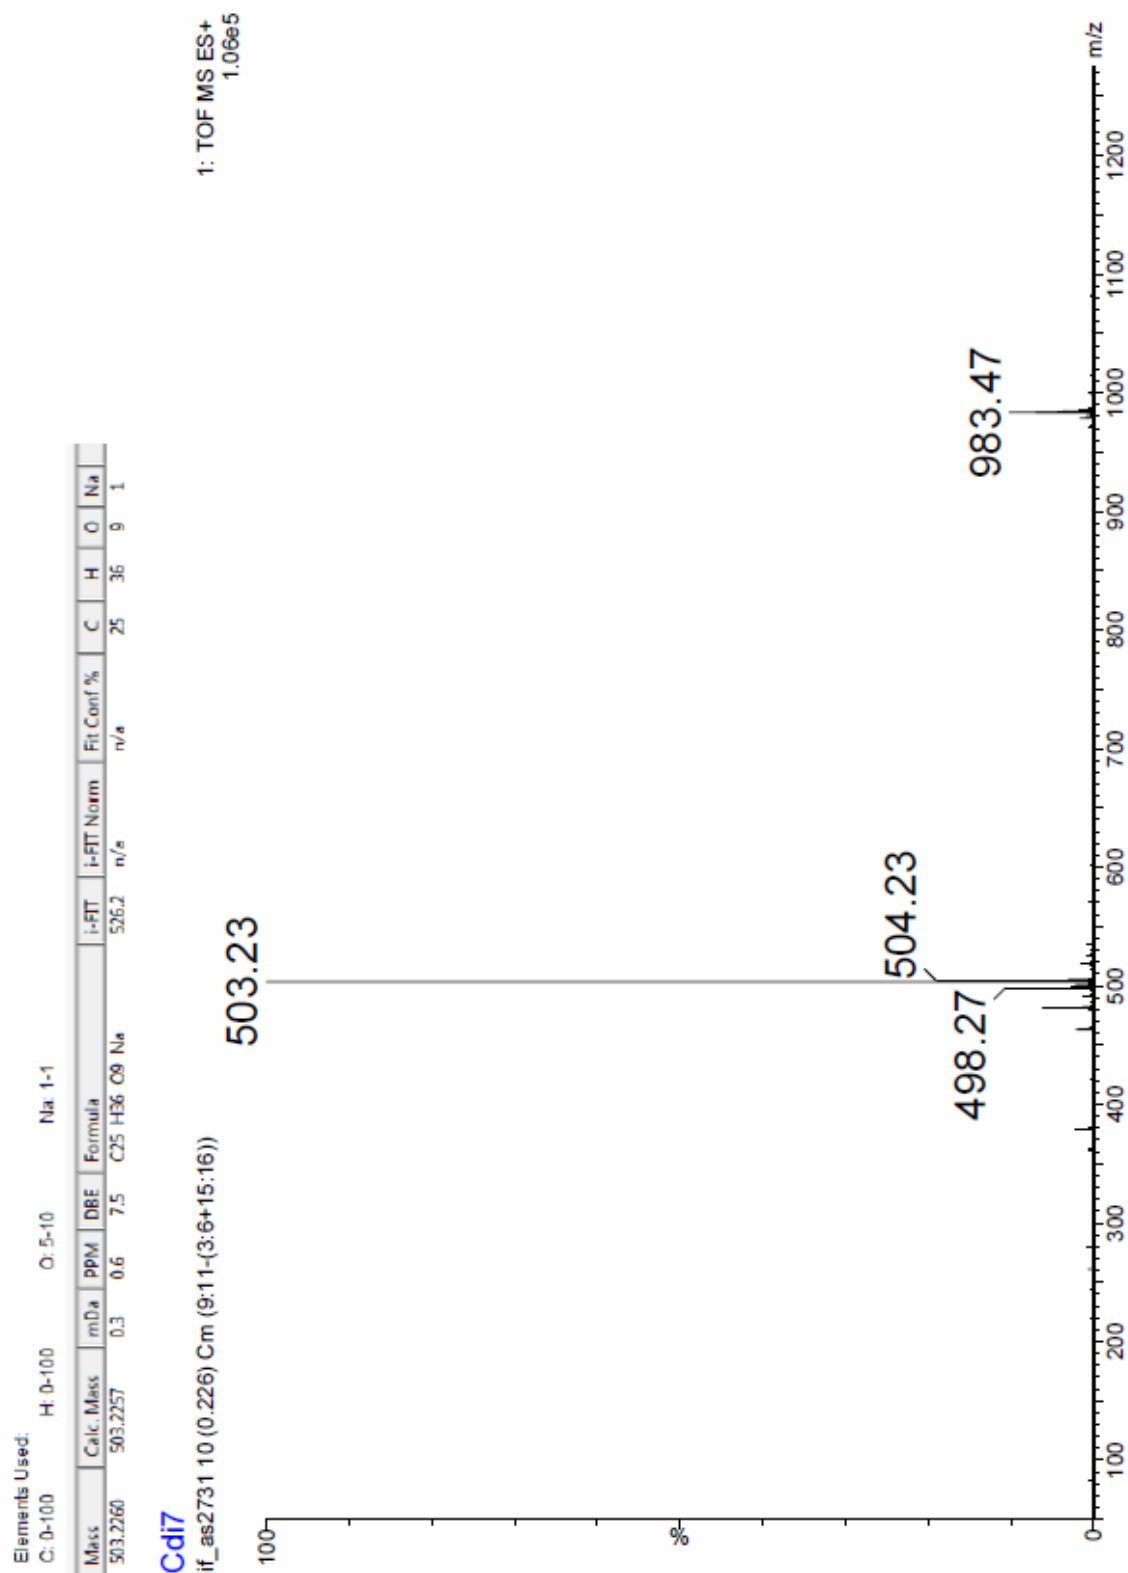

Fig. S1. HRESIMS spectrum of 4 $\beta$ ,8 $\alpha$ -dihydroxy- 5 $\beta$ -angeloyloxy-9 $\beta$ -(2-methylbutyryloxy)-3-oxo-germacran-6 $\alpha$ ,12-olide (**1**)

Jagiellonskie Centrum Innowacji  
Pracownia NMR  
Probka: Cdi 7

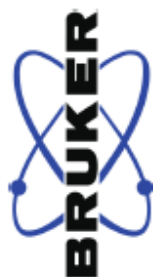

Current Data Parameters  
NAME 17-02-04-cdi7  
EXPNO 10  
PROCNO 1

F2 - Acquisition Parameters  
Date\_ 20170204  
Time 12.09 h  
INSTRUM spect  
PROBHD Z108618\_0682 (zg30)  
PULPROG 32050  
TD 32050  
SOLVENT CDCl3  
NS 128  
DS 0  
SWH 7211.539 Hz  
FIDRES 0.450018 Hz  
AQ 2.2221334 sec  
RG 140.97  
DW 69.333 usec  
DE 6.50 usec  
TE 298.5 K  
D1 1.00000000 sec  
TD0 1  
SFO1 400.1728012 MHz  
NUC1 1H  
P1 15.25 usec  
PLW1 11.30000019 W

F2 - Processing parameters  
SI 65536  
SF 400.1700000 MHz  
WDW EM  
SSB 0  
LB 0.10 Hz  
GB 0  
PC 1.00

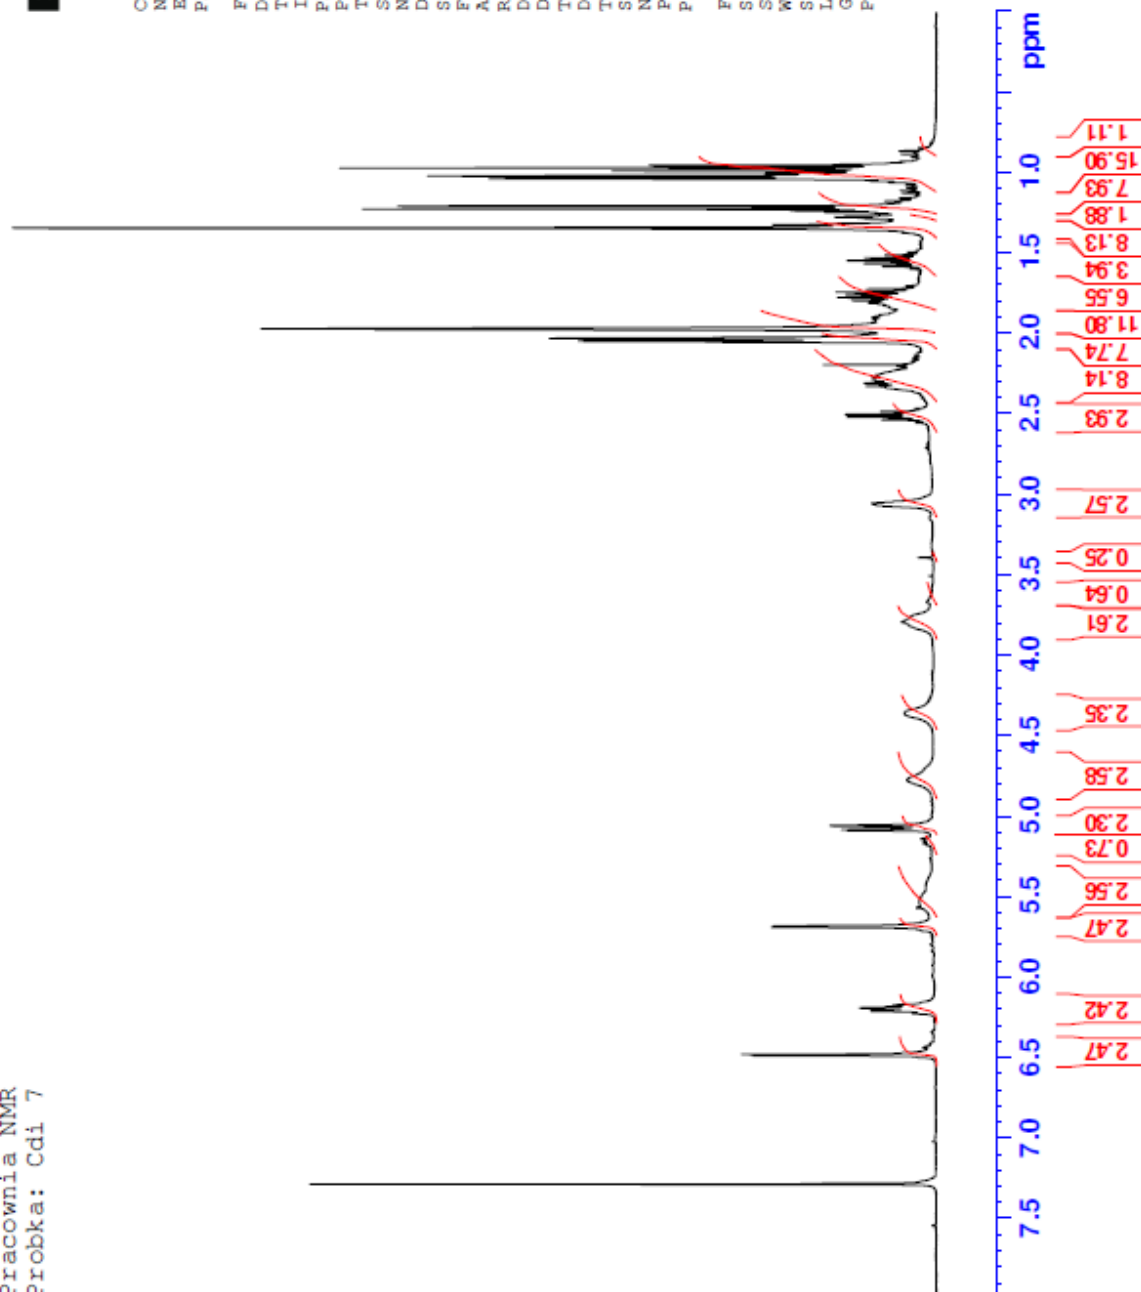

Fig. S2.  $^1\text{H}$  NMR spectrum of **1**

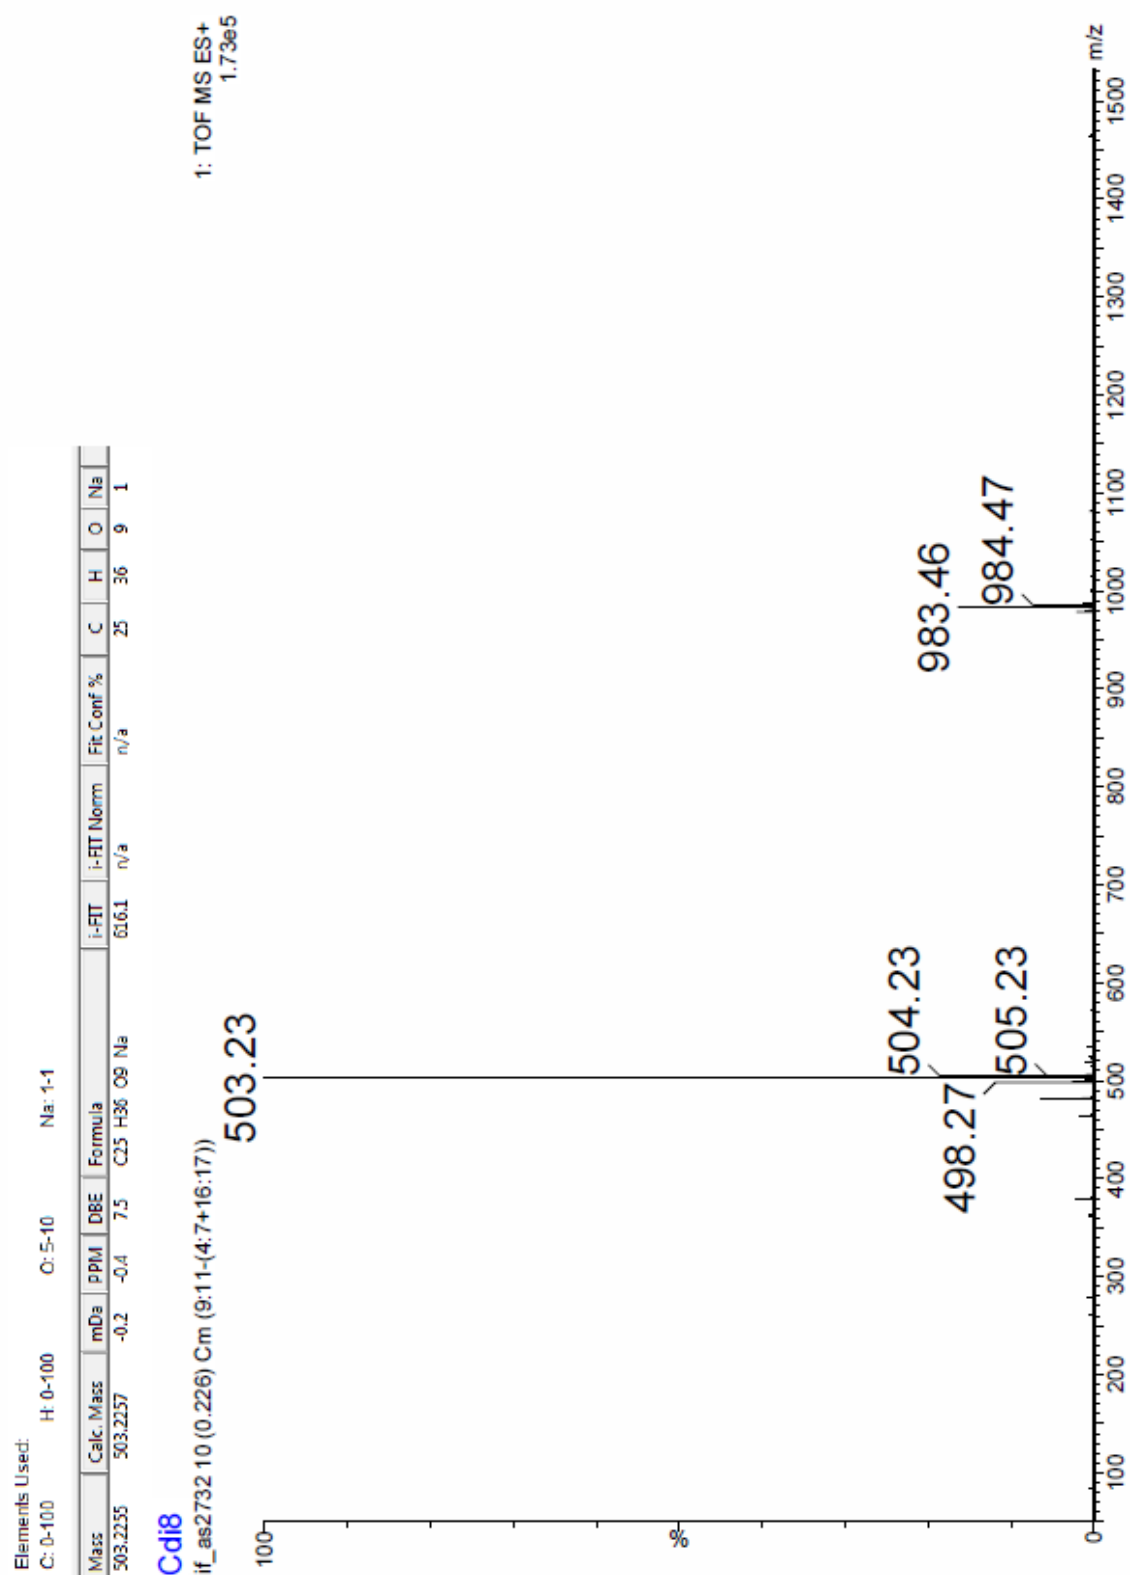

Fig. S3. HRESIMS spectrum of 4 $\beta$ ,8 $\alpha$ -dihydroxy-5 $\beta$ -angeloyloxy-9 $\beta$ -(3-methylbutyryloxy)-3-oxo-germacran- 6 $\alpha$ ,12-olide (cardivarolide G, **2**)

Jagiellonskie Centrum Innowacji  
Pracownia NMR  
Probka: Cdi 8

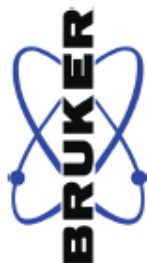

Current Data Parameters  
NAME 17-02-10-cdi8  
EXPNO 40  
PROCNO 1

F2 - Acquisition Parameters  
Date\_ 20170210  
Time 17.26 h  
INSTRUM spect  
PROBHD z108618\_0682 (zq30)  
PULPROG zg30  
TD 32050  
SOLVENT CDCl3  
NS 80  
DS 0  
SWH 6410.256 Hz  
FIDRES 0.400016 Hz  
AQ 2.4999001 sec  
RG 140.97  
DW 78.000 usec  
DE 6.50 usec  
TE 298.9 K  
D1 1.00000000 sec  
TD0 1  
SFO1 400.1728012 MHz  
NUC1 1H  
P1 15.25 usec  
PLW1 11.30000019 W

F2 - Processing parameters  
SI 65536  
SF 400.1700000 MHz  
WDW EM  
SSB 0  
LB 0.10 Hz  
GB 0  
PC 1.00

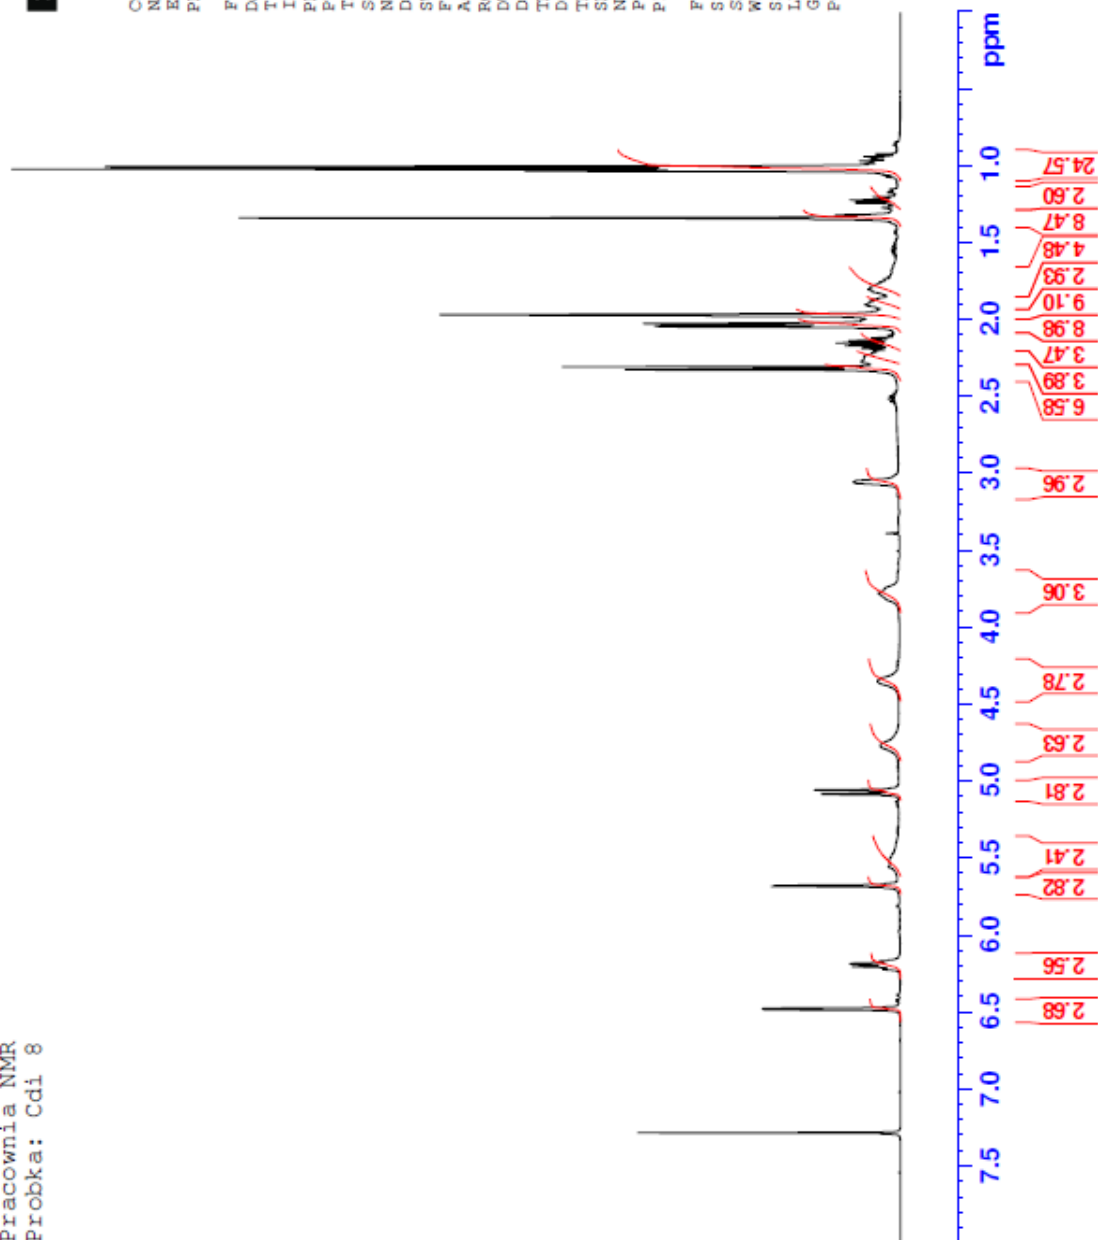

Fig. S4.  $^1\text{H}$  NMR spectrum of **2** in  $\text{CDCl}_3$

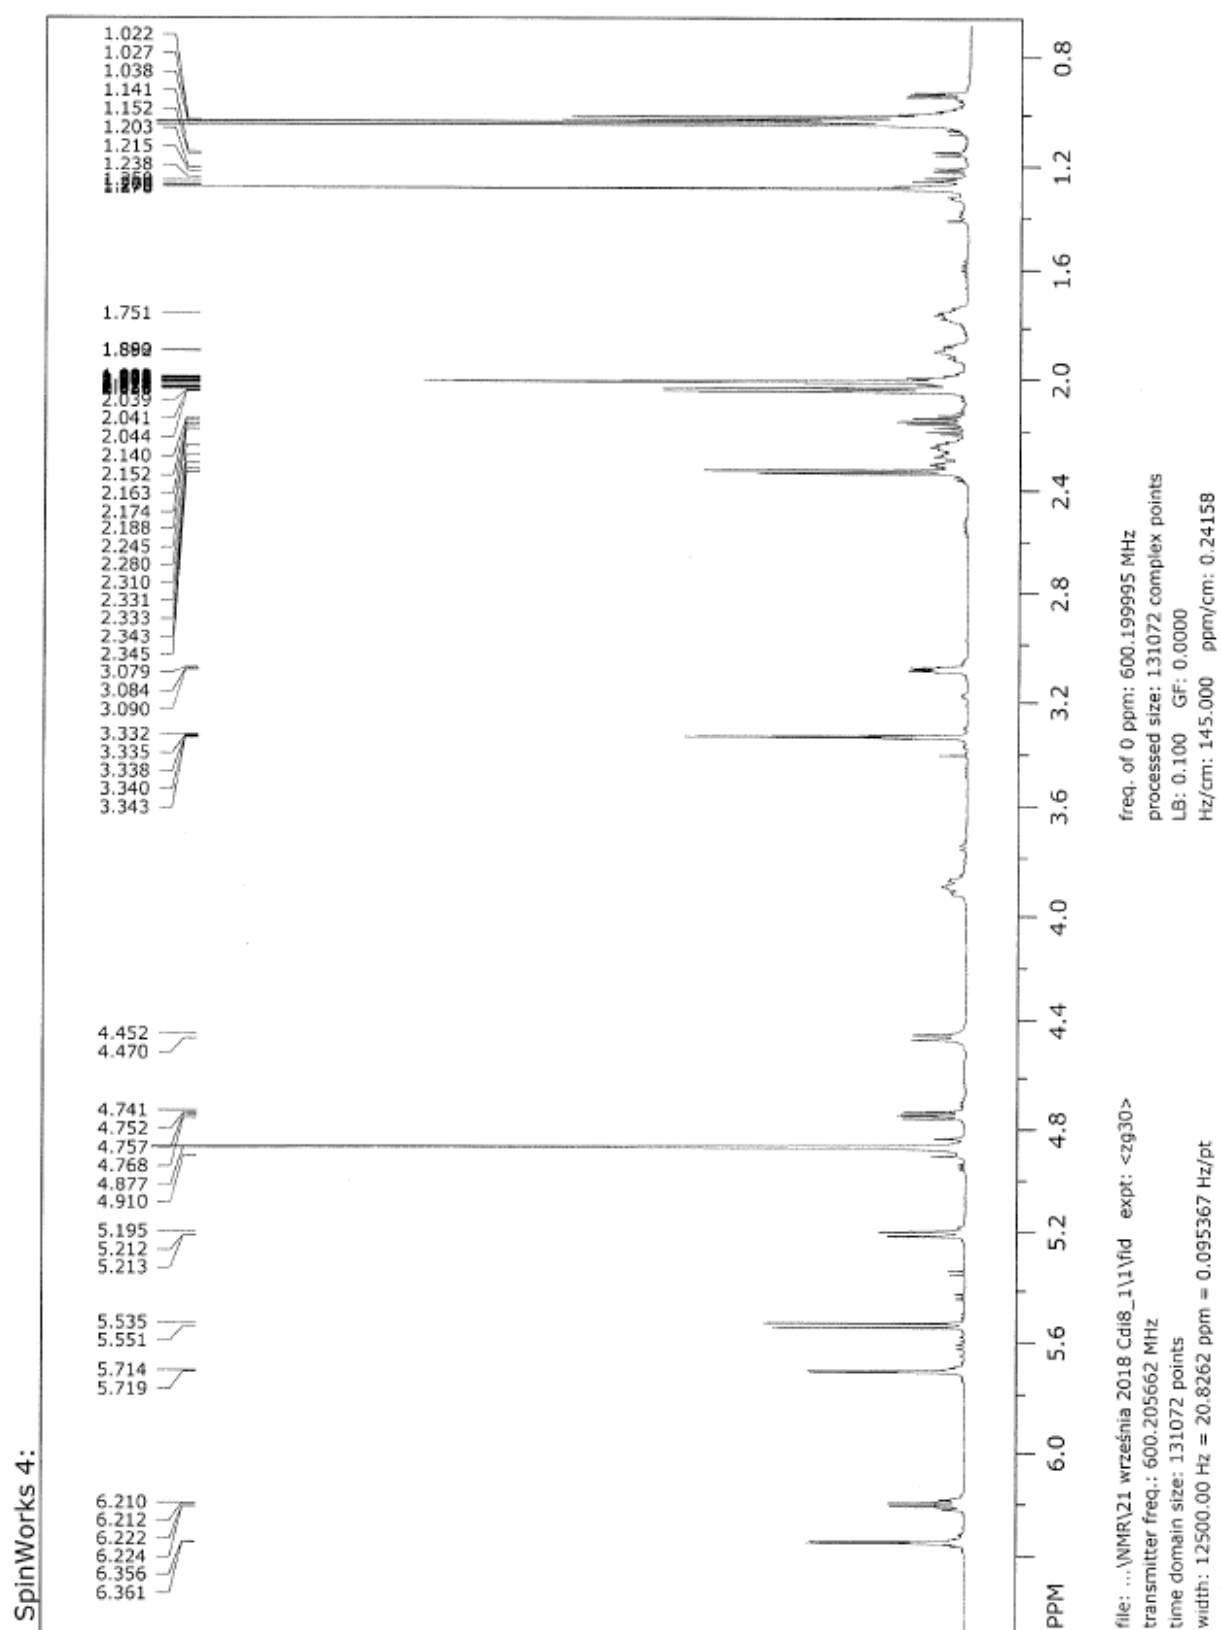

Fig. S5.  $^1\text{H}$  NMR spectrum of **2** in  $\text{CD}_3\text{OD}$

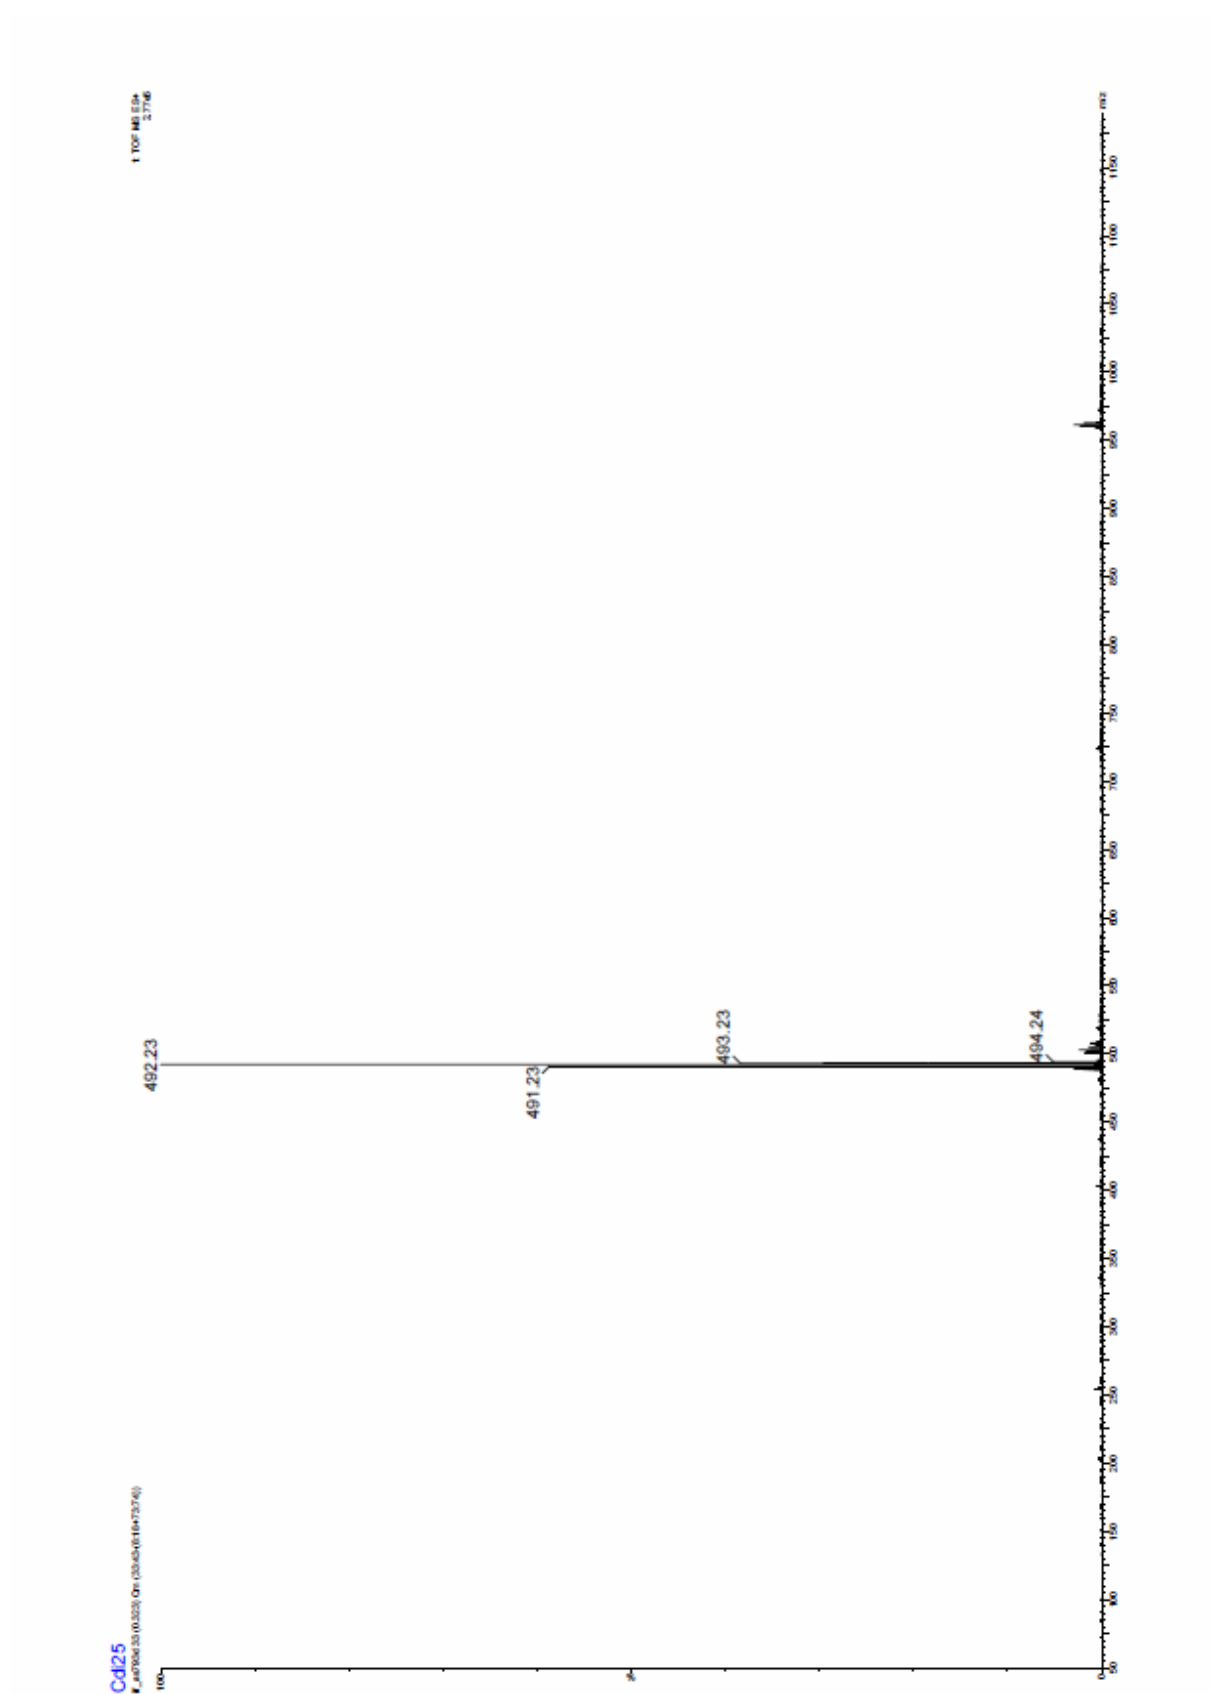

Fig. S6. HRESIMS spectrum of  $4\beta,8\alpha$ -dihydroxy- $5\beta$ -isobutyryloxy- $9\beta$ -(3-methylbutyryloxy)-3-oxo-germacran- $6\alpha,12$ -olide (**3**)

Jagiellonskie Centrum Innowacji  
Pracownia NMR  
Probka: cdi25

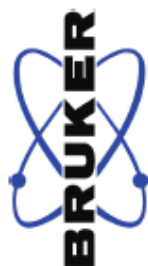

Current Data Parameters  
NAME 19-12-23-cdi25  
EXPNO 9  
PROCNO 1

F2 - Acquisition Parameters

Date\_ 20191223  
Time 13.06 h  
INSTRUM spect  
PROBHD Z108618\_0682 (zg30)  
PULPROG zg30  
TD 32050  
SOLVENT MeOD  
NS 128  
DS 0  
SWH 6410.256 Hz  
FIDRES 0.400016 Hz  
AQ 2.4999001 sec  
RG 140.97  
DW 78.000 usec  
DE 6.50 usec  
TE 296.9 K  
D1 1.00000000 sec  
TD0 1  
SFO1 400.1728012 MHz  
NUC1 1H  
P1 15.25 usec  
PLW1 11.30000019 W

F2 - Processing parameters

SI 65536  
SF 400.1700000 MHz  
WDW EM  
SSB 0  
LB 0.10 Hz  
GB 0  
PC 1.00

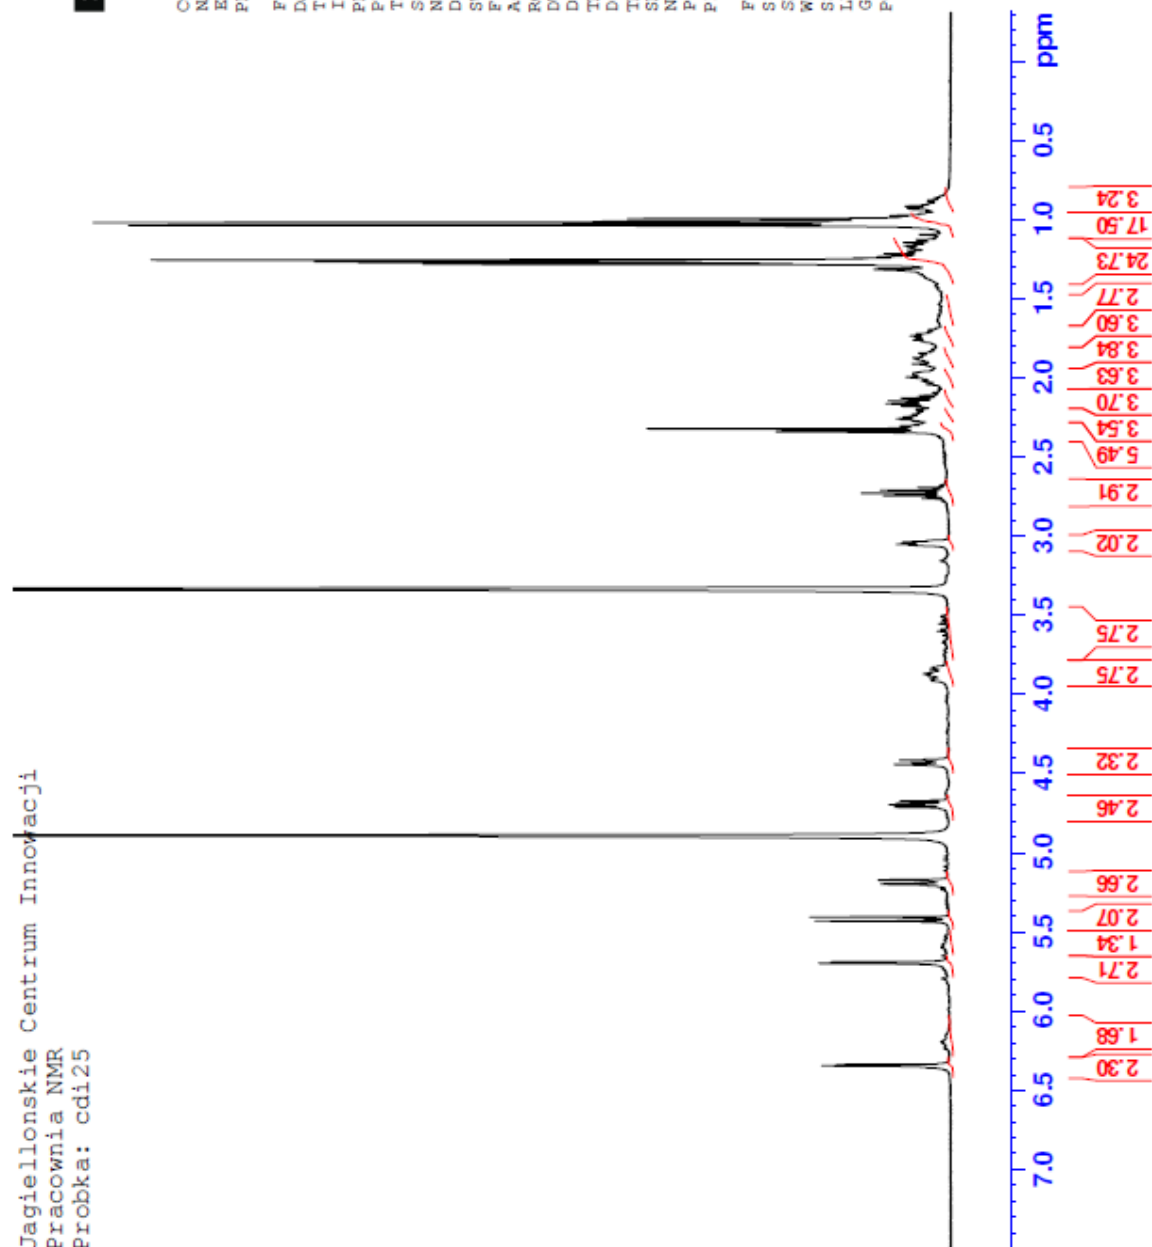

Fig. S7.  $^1\text{H}$  NMR spectrum of **3**
